# Supplementary material for: Adverse prognostic impact of the CpG island methylator phenotype in metastatic colorectal cancer
Source: PubMed Central journal article supplement — Br J Cancer. 2016 Jun 16;115(2):164–71. doi: 10.1038/bjc.2016.176 (PMC4947699; doi:10.1038/bjc.2016.176), 2016-06-16
Supplement: bjc2016176x3.pdf [file bjc2016176x3.pdf]

**Supplementary material 3: Multivariable analysis of overall and progression free survival with the number of methylated CIMP loci as a continuous variable**

| Covariates in the final model                                             | Overall survival     |         | Covariates in the final model | Progression free survival |       |
|---------------------------------------------------------------------------|----------------------|---------|-------------------------------|---------------------------|-------|
|                                                                           | Adjusted HR (95% CI) | P       |                               | Adjusted HR (95% CI)      | P     |
| <b>Overall population (N = 153)</b>                                       |                      |         |                               |                           |       |
| Age                                                                       | 1.02 (0.998-1.04)    | 0.085   |                               |                           |       |
| Female (N = 49)                                                           | 1.56 (1.01-2.42)     | 0.044   |                               |                           |       |
| ECOG ≥ 1 (N = 119)                                                        | 1.81 (1.02-3.22)     | 0.042   |                               |                           |       |
| Metastatic organ ≥ 3 (N = 11)                                             | 4.54 (2.23-9.22)     | < 0.001 |                               |                           |       |
| CEA > 5.0 ng/mL (N = 94)                                                  | 1.56 (1.00-2.41)     | 0.049   |                               |                           |       |
| N. methylated CIMP loci                                                   | 1.44 (1.24-1.66)     | < 0.001 |                               |                           |       |
| <b>Fluoropyrimidine and oxaliplatin first-line chemotherapy (N = 128)</b> |                      |         |                               |                           |       |
| ECOG ≥ 1 (N = 96)                                                         | 1.62 (0.897-2.91)    | 0.11    | ECOG ≥ 1 (N = 96)             | 1.81 (1.08-3.03)          | 0.024 |
| Metastatic organ ≥ 3 (N = 9)                                              | 4.25 (2.02-8.95)     | < 0.001 | Metastatic organ ≥ 3 (N = 9)  | 2.51 (1.13-5.60)          | 0.024 |
| Poor differentiation (N = 12)                                             | 1.97 (0.991-3.92)    | 0.053   | N. methylated CIMP loci       | 1.26 (1.09-1.44)          | 0.001 |
| N. methylated CIMP loci                                                   | 1.38 (1.19-1.61)     | < 0.001 |                               |                           |       |
| <b>Fluoropyrimidine and irinotecan second-line chemotherapy (N = 86)</b>  |                      |         |                               |                           |       |
| Female (N = 30)                                                           | 1.72 (0.955-3.11)    | 0.071   | Female (N = 30)               | 2.00 (1.18-3.39)          | 0.01  |
| Metastatic organ ≥ 3 (N = 6)                                              | 3.02 (1.13-8.10)     | 0.028   | ECOG ≥ 1 (N = 66)             | 1.84 (1.03-3.29)          | 0.038 |
| CEA ≥ 5.0 ng/mL (N = 54)                                                  | 2.36 (1.29-4.31)     | 0.005   | CEA ≥ 5.0 ng/mL (N = 54)      | 1.88 (1.11-3.17)          | 0.018 |
| Distal location (N = 61)                                                  | 2.36 (1.17-4.78)     | 0.017   | MSS/MSI-low (N = 81)          | 4.89 (1.11-21.6)          | 0.036 |
| N. methylated CIMP loci                                                   | 1.72 (1.40-2.11)     | < 0.001 | N. methylated CIMP loci       | 1.28 (1.07-1.52)          | 0.006 |

Abbreviations: HR, hazard ratio; ECOG, eastern cooperative oncology group; CEA, carcinoembryonic antigen; CIMP, CpG island methylator phenotype; MSI, microsatellite instability; MSS, microsatellite stable.
